# Supplementary material for: Clonal expansion across the seas as seen through CPLP-TB database: A joint effort in cataloguing Mycobacterium tuberculosis genetic diversity in Portuguese-speaking countries
Source: PubMed Central journal article supplement (PMC6598853; doi:10.1016/j.meegid.2018.03.011), 2019-08
Supplement: mmc7.pdf [file mmc7.pdf]

**Supplementary Table S3** – Fifteen-loci MIRU-VNTR clusters found, main associated SITs and distribution by country of origin.

| MIRU-VNTR Cluster | Associated SITs    | No. of Isolates |        |               |            |          | Total |
|-------------------|--------------------|-----------------|--------|---------------|------------|----------|-------|
|                   |                    | Angola          | Brazil | Guinea-Bissau | Mozambique | Portugal |       |
| AO-01             | 20                 | 2               | 0      | 0             | 0          | 0        | 2     |
| AO-02             | 1548               | 2               | 0      | 0             | 0          | 0        | 2     |
| AO-03             | 244                | 2               | 0      | 0             | 0          | 0        | 2     |
| AO-04             | 20                 | 2               | 0      | 0             | 0          | 0        | 2     |
| CPLP-01           | 20, 1755, 42       | 8               | 6      | 0             | 0          | 2        | 16    |
| CPLP-02           | 20, 2271, 2572     | 1               | 0      | 0             | 0          | 2        | 3     |
| CPLP-03           | 237                | 0               | 1      | 0             | 0          | 1        | 2     |
| CPLP-04           | 20                 | 1               | 1      | 0             | 0          | 0        | 2     |
| CPLP-05           | 1530               | 1               | 3      | 0             | 0          | 0        | 4     |
| CPLP-06           | 1530, 4152         | 0               | 1      | 0             | 0          | 1        | 2     |
| CPLP-07           | 194, 17            | 1               | 2      | 0             | 0          | 1        | 4     |
| CPLP-08           | 33, 1224           | 0               | 1      | 0             | 0          | 1        | 2     |
| CPLP-09           | nd                 | 1               | 1      | 0             | 0          | 0        | 2     |
| CPLP-10           | 53                 | 1               | 0      | 0             | 0          | 1        | 2     |
| GW-01             | 1                  | 0               | 0      | 2             | 0          | 0        | 2     |
| GW-02             | 1                  | 0               | 0      | 3             | 0          | 0        | 3     |
| Lisboa3-A         | 20, 42             | 0               | 0      | 0             | 0          | 11       | 11    |
| Lisboa3-B         | 20, 42             | 0               | 0      | 0             | 0          | 38       | 38    |
| POA-01            | 863                | 0               | 4      | 0             | 0          | 0        | 4     |
| POA-02            | 17                 | 0               | 2      | 0             | 0          | 0        | 2     |
| PT-01             | 92                 | 0               | 0      | 0             | 0          | 2        | 2     |
| PT-02             | 1                  | 0               | 0      | 0             | 0          | 3        | 3     |
| PT-03             | 1752               | 0               | 0      | 0             | 0          | 4        | 4     |
| PT-04             | 211                | 0               | 0      | 0             | 0          | 2        | 2     |
| PT-05             | 53                 | 0               | 0      | 0             | 0          | 2        | 2     |
| PT-06             | 1                  | 0               | 0      | 0             | 0          | 2        | 2     |
| PT-07             | 1106               | 0               | 0      | 0             | 0          | 4        | 4     |
| PT-08             | 20, 2271           | 0               | 0      | 0             | 0          | 3        | 3     |
| PT-09             | 20, 42             | 0               | 0      | 0             | 0          | 2        | 2     |
| Q1                | 290, 42, 1106      | 1               | 0      | 0             | 0          | 26       | 27    |
| RG-01             | 2512, 729          | 0               | 20     | 0             | 0          | 0        | 20    |
| RG-02             | 17                 | 0               | 2      | 0             | 0          | 0        | 2     |
| RG-03             | 65, 45, 2512, 4145 | 0               | 27     | 0             | 0          | 0        | 27    |
| RG-04             | nd                 | 0               | 2      | 0             | 0          | 0        | 2     |
| RG-05             | 45                 | 0               | 13     | 0             | 0          | 0        | 13    |
| RG-06             | nd                 | 0               | 2      | 0             | 0          | 0        | 2     |
| RG-07             | 20                 | 0               | 2      | 0             | 0          | 0        | 2     |
| RG-08             | 45                 | 0               | 2      | 0             | 0          | 0        | 2     |
| RG-09             | 20                 | 0               | 8      | 0             | 0          | 0        | 8     |
| RG-10             | 65                 | 0               | 4      | 0             | 0          | 0        | 4     |
| RG-11             | 65                 | 0               | 2      | 0             | 0          | 0        | 2     |

|       |           |   |    |   |   |   |    |
|-------|-----------|---|----|---|---|---|----|
| RG-12 | nd        | 0 | 2  | 0 | 0 | 0 | 2  |
| RG-13 | nd        | 0 | 2  | 0 | 0 | 0 | 2  |
| RG-14 | 602       | 0 | 2  | 0 | 0 | 0 | 2  |
| RG-15 | 45        | 0 | 2  | 0 | 0 | 0 | 2  |
| RG-16 | 45        | 0 | 2  | 0 | 0 | 0 | 2  |
| RG-17 | 137       | 0 | 2  | 0 | 0 | 0 | 2  |
| RG-18 | 53        | 0 | 10 | 0 | 0 | 0 | 10 |
| RG-19 | 602       | 0 | 2  | 0 | 0 | 0 | 2  |
| RG-20 | nd        | 0 | 2  | 0 | 0 | 0 | 2  |
| RG-21 | 45        | 0 | 3  | 0 | 0 | 0 | 3  |
| RG-22 | 33        | 0 | 2  | 0 | 0 | 0 | 2  |
| RG-23 | 53, 50    | 0 | 2  | 0 | 0 | 0 | 2  |
| RG-24 | 60, 177   | 0 | 2  | 0 | 0 | 0 | 2  |
| RG-25 | 20, 65    | 0 | 5  | 0 | 0 | 0 | 5  |
| RG-26 | 177       | 0 | 2  | 0 | 0 | 0 | 2  |
| RG-27 | 33        | 0 | 4  | 0 | 0 | 0 | 4  |
| RG-28 | 60        | 0 | 2  | 0 | 0 | 0 | 2  |
| RG-29 | 65        | 0 | 4  | 0 | 0 | 0 | 4  |
| RG-30 | 65        | 0 | 2  | 0 | 0 | 0 | 2  |
| RG-31 | 42, 4157  | 0 | 4  | 0 | 0 | 0 | 4  |
| RG-32 | nd        | 0 | 2  | 0 | 0 | 0 | 2  |
| RG-33 | nd        | 0 | 2  | 0 | 0 | 0 | 2  |
| RG-34 | 4148      | 0 | 2  | 0 | 0 | 0 | 2  |
| RG-35 | nd        | 0 | 2  | 0 | 0 | 0 | 2  |
| RS-01 | 58        | 0 | 2  | 0 | 0 | 0 | 2  |
| RS-02 | 50        | 0 | 2  | 0 | 0 | 0 | 2  |
| RS-03 | 65        | 0 | 24 | 0 | 0 | 0 | 24 |
| RS-04 | 106       | 0 | 4  | 0 | 0 | 0 | 4  |
| RS-05 | 863, 4157 | 0 | 4  | 0 | 0 | 0 | 4  |
| RS-06 | 99        | 0 | 2  | 0 | 0 | 0 | 2  |
| RS-07 | 53        | 0 | 2  | 0 | 0 | 0 | 2  |
| RS-08 | 53        | 0 | 3  | 0 | 0 | 0 | 3  |
| RS-09 | 179       | 0 | 2  | 0 | 0 | 0 | 2  |
| RS-10 | 453       | 0 | 2  | 0 | 0 | 0 | 2  |

---

nd - not determined
