# Supplementary material for: Clonal expansion across the seas as seen through CPLP-TB database: A joint effort in cataloguing Mycobacterium tuberculosis genetic diversity in Portuguese-speaking countries
Source: PubMed Central journal article supplement (PMC6598853; doi:10.1016/j.meegid.2018.03.011), 2019-08
Supplement: mmc8.pdf [file mmc8.pdf]

**Supplementary Table S4** – Twenty-four-loci MIRU-VNTR clusters found, main associated SITs and distribution by country of origin.

| MIRU-VNTR Cluster | Associated SITs | No. of Isolates |        |               |            |          |       |
|-------------------|-----------------|-----------------|--------|---------------|------------|----------|-------|
|                   |                 | Angola          | Brazil | Guinea-Bissau | Mozambique | Portugal | Total |
| AO-01             | 20              | 2               | 0      | 0             | 0          | 0        | 2     |
| AO-02             | 1548            | 2               | 0      | 0             | 0          | 0        | 2     |
| AO-03             | 244             | 2               | 0      | 0             | 0          | 0        | 2     |
| AO-04             | 20              | 2               | 0      | 0             | 0          | 0        | 2     |
| CPLP-01           | 20, 42          | 6               | 1      | 0             | 0          | 1        | 8     |
| CPLP-01B          | 20              | 1               | 0      | 0             | 0          | 1        | 2     |
| CPLP-02           | 20, 2271, 2572  | 1               | 0      | 0             | 0          | 2        | 3     |
| CPLP-03           | 237             | 0               | 1      | 0             | 0          | 1        | 2     |
| CPLP-07           | 17, 194         | 1               | 0      | 0             | 0          | 1        | 2     |
| CPLP_11           | 42, 290         | 1               | 0      | 0             | 0          | 1        | 2     |
| GW-01             | 1               | 0               | 0      | 2             | 0          | 0        | 2     |
| GW-02             | 1               | 0               | 0      | 3             | 0          | 0        | 3     |
| Lisboa3-A         | 20, 42          | 0               | 0      | 0             | 0          | 9        | 9     |
| Lisboa3-B         | 20, 42          | 0               | 0      | 0             | 0          | 37       | 37    |
| POA-01            | 863             | 0               | 3      | 0             | 0          | 0        | 3     |
| POA-02            | 17              | 0               | 2      | 0             | 0          | 0        | 2     |
| PT-01             | 92              | 0               | 0      | 0             | 0          | 2        | 2     |
| PT-02             | 1               | 0               | 0      | 0             | 0          | 3        | 3     |
| PT-03             | 1752            | 0               | 0      | 0             | 0          | 4        | 4     |
| PT-04             | 211             | 0               | 0      | 0             | 0          | 2        | 2     |
| PT-05             | 53              | 0               | 0      | 0             | 0          | 2        | 2     |
| PT-06             | 1               | 0               | 0      | 0             | 0          | 2        | 2     |
| PT-07             | 1106            | 0               | 0      | 0             | 0          | 4        | 4     |
| Q1                | 1106            | 0               | 0      | 0             | 0          | 22       | 22    |
| RS-01             | 58              | 0               | 2      | 0             | 0          | 0        | 2     |
| RS-02             | 50              | 0               | 2      | 0             | 0          | 0        | 2     |
| RS-03             | 65              | 0               | 8      | 0             | 0          | 0        | 8     |
| RS-04             | 106             | 0               | 4      | 0             | 0          | 0        | 4     |
| RS-05             | 863             | 0               | 3      | 0             | 0          | 0        | 3     |
| RS-06             | 99              | 0               | 2      | 0             | 0          | 0        | 2     |
| RS-08             | 53              | 0               | 3      | 0             | 0          | 0        | 3     |
| RS-09             | 179             | 0               | 2      | 0             | 0          | 0        | 2     |
| RS-10             | 453             | 0               | 2      | 0             | 0          | 0        | 2     |
