# Supplementary material for: Clonal expansion across the seas as seen through CPLP-TB database: A joint effort in cataloguing Mycobacterium tuberculosis genetic diversity in Portuguese-speaking countries
Source: Infect Genet Evol. 2019 Aug;72:44–58. doi: 10.1016/j.meegid.2018.03.011 (PMC6598853; doi:10.1016/j.meegid.2018.03.011)
Supplement: Supplementary file 5 — Supplementary Table S1 [file mmc5.pdf]

[illegible][illegible]

[illegible]

\*\*\* SIT1779 in SITVITWEB was deleted in SITVIT2 database: the pattern is however retained pending its reassignment if new strains are reported in future.
