# Supplementary material for: Clonal expansion across the seas as seen through CPLP-TB database: A joint effort in cataloguing Mycobacterium tuberculosis genetic diversity in Portuguese-speaking countries
Source: Infect Genet Evol. 2019 Aug;72:44–58. doi: 10.1016/j.meegid.2018.03.011 (PMC6598853; doi:10.1016/j.meegid.2018.03.011)
Supplement: Supplementary file 6 — Supplementary Table S2 [file mmc6.pdf]

\*\* Worldwide distribution is reported for regions with more than 2% of a given SIT as compared to their total number in the SITVIT database.
